# Supplementary material
Source: PubMed Central journal article supplement (PMC5003652)
Supplement: NIHMS795327-supplement-supplement_1.pdf [file NIHMS795327-supplement-supplement_1.pdf]

Supplemental Figure 1. Kaplan-Meier estimates of overall survival for patients from the validation cohort stratified using (A) the preoperative model and (B) the postoperative model.

Supplemental Table 1. Recurrence Patterns according to Risk Groups in the Primary Cohort

(Memorial Sloan Kettering Cancer center, n=189)

|                                 | <b>Overall recurrence rate (n=110) , n (%)*</b> | <b>Within 24 mo recurrence rate (n=92), n (%)</b> | <b>Hepatic recurrence within 24 mo (n=83), n/N<sup>†</sup></b> | <b>After 24 mo recurrence rate (n=18), n (%)</b> | <b>Extrahepatic recurrence after 24 mo (n=11), n/N<sup>‡</sup></b> |
|---------------------------------|-------------------------------------------------|---------------------------------------------------|----------------------------------------------------------------|--------------------------------------------------|--------------------------------------------------------------------|
| Preoperative model              |                                                 |                                                   |                                                                |                                                  |                                                                    |
| Low risk group (=117)           | 54 (46.2)                                       | 40 (74.1)                                         | 34/40                                                          | 14 (25.9)                                        | 9/14                                                               |
| High risk group (n=72)          | 56 (77.8)                                       | 52 (92.8)                                         | 42/52                                                          | 4 (7.1)                                          | 2/4                                                                |
| Postoperative model             |                                                 |                                                   |                                                                |                                                  |                                                                    |
| Low risk group (n=64)           | 21 (32.8)                                       | 14 (66.7)                                         | 13/14                                                          | 7 (33.3)                                         | 5/7                                                                |
| Intermediate risk group (n=104) | 70 (67.3)                                       | 61 (87.1)                                         | 50/61                                                          | 9 (12.9)                                         | 4/9                                                                |
| High risk group (n=21)          | 19 (90.5)                                       | 17 (89.5)                                         | 13/17                                                          | 2 (10.5)                                         | 2/2                                                                |

\*n is the denominator for each risk group (each row).

<sup>†</sup>N is the denominator for each risk group (number of recurrence within 24 months).

<sup>‡</sup>N is the denominator for each risk group (number of recurrences after 24 months).

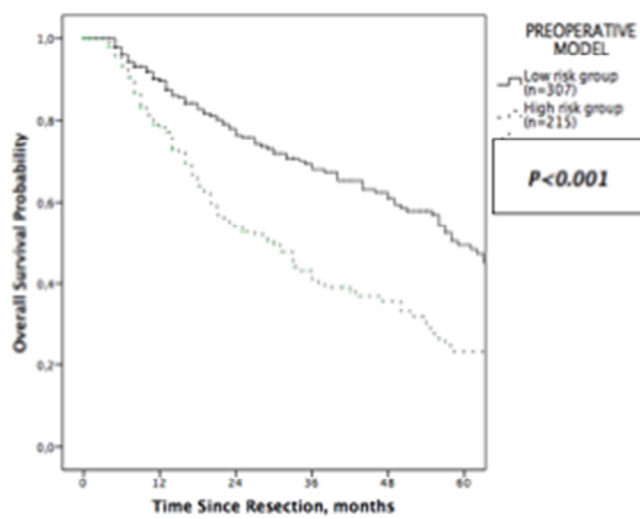

|                          |     |     |    |    |    |
|--------------------------|-----|-----|----|----|----|
| Patients at risk (n=307) | 188 | 131 | 99 | 74 | 30 |
| Patients at risk (n=215) | 121 | 66  | 38 | 26 | 10 |

A

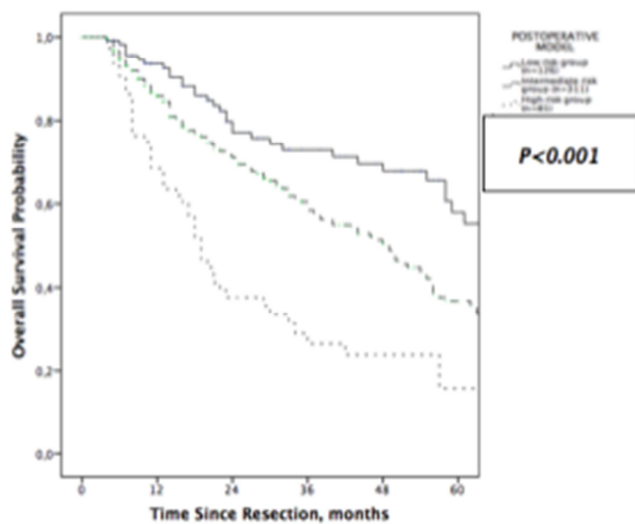

|                          |     |     |    |    |    |
|--------------------------|-----|-----|----|----|----|
| Patients at risk (n=126) | 81  | 56  | 44 | 33 | 13 |
| Patients at risk (n=311) | 187 | 122 | 83 | 60 | 24 |
| Patients at risk (n=85)  | 41  | 18  | 10 | 6  | 3  |

B
